# Supplementary material for: Characterization of intermolecular G-quadruplex formation over intramolecular G-triplex for DNA containing three G-tracts
Source: Royal Society of Chemistry journal article supplement (doi:10.1039/d0an00791a), 2020-01-01
Supplement: d0an00791a1.pdf [file d0an00791a1.pdf]

*Supporting for*

**Characterization of intermolecular G-quadruplex formation over intramolecular G-triplex for DNA containing three G-tracts**

Qingqing Zhang,<sup>a</sup> Tong Yang,<sup>a</sup> Guoxiang Zheng,<sup>b</sup> Heng Gao,<sup>a</sup> Chenxiao Yan,<sup>a</sup> Xiong  
Zheng,<sup>a</sup> Xiaoshun Zhou<sup>a</sup> and Yong Shao<sup>\*,a</sup>

<sup>a</sup> Key Laboratory of the Ministry of Education for Advanced Catalysis Materials,  
Institute of Physical Chemistry, College of Chemistry and Life Sciences, Zhejiang  
Normal University, Jinhua 321004, Zhejiang, China.

<sup>b</sup> Undergraduate Teaching Department, Zhejiang Normal University, Jinhua 321004,  
Zhejiang, China.

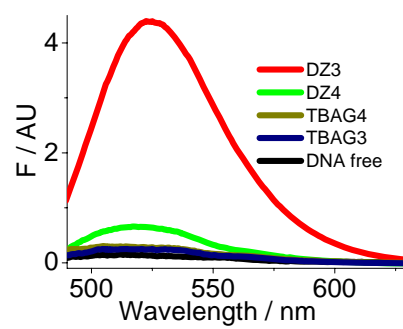

**Figure S1.** Fluorescence spectra of AO (10  $\mu\text{M}$ ) in the absence and presence of TBAG3 and TBAG4 (1  $\mu\text{M}$ ) in comparison with DZ3 and DZ4, respectively.

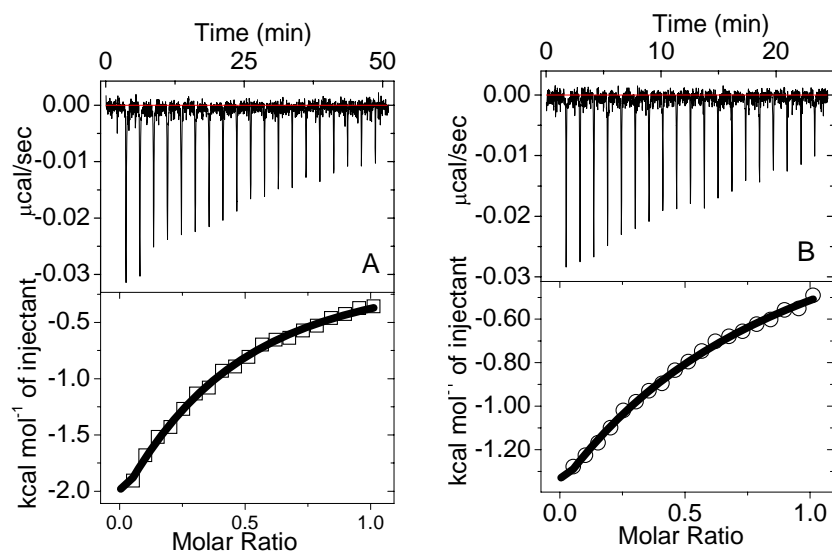

**Figure S2.** Binding of AO with (A) G4T4G3 and (B) G4T4G4 evaluated by ITC. G4T4G3 and G4T4G4 (20  $\mu\text{M}$ ) were separately titrated by 100  $\mu\text{M}$  AO in 50 mM Tris buffer (pH 7.0) containing 100 mM  $\text{K}^+$  at 20  $^{\circ}\text{C}$ .

**Table S1** Fitted thermodynamic results of ITC experiments.

|        | n<br>site             | K<br>10 <sup>5</sup> /M | $\Delta$ H<br>kcal/mol  | $\Delta$ S<br>cal/mol/deg | $\Delta$ G(293 K)<br>kcal/mol |
|--------|-----------------------|-------------------------|-------------------------|---------------------------|-------------------------------|
| DZ3    | 0.24<br>( $\pm$ 0.01) | 2.57<br>( $\pm$ 0.11)   | -14.07<br>( $\pm$ 0.52) | -23.3                     | -7.78                         |
| DZ4    | 0.50<br>( $\pm$ 0.02) | 1.4<br>( $\pm$ 0.04)    | -11.03<br>( $\pm$ 0.41) | -14.1                     | -6.83                         |
| G4T4G3 | 0.26<br>( $\pm$ 0.04) | 0.90<br>( $\pm$ 0.10)   | -6.29<br>( $\pm$ 1.24)  | 1.23                      | -6.65                         |
| G4T4G4 | 0.28<br>( $\pm$ 0.20) | 0.27<br>( $\pm$ 0.06)   | -10.36<br>( $\pm$ 9.02) | -15.1                     | -7.32                         |

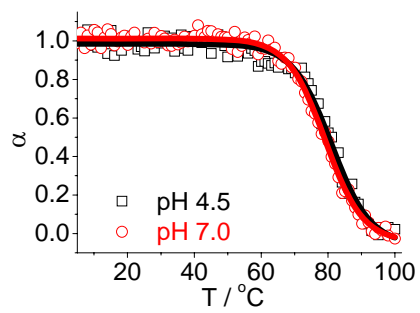

**Figure S3.** Melting curves of DZ4 (6  $\mu\text{M}$ ) at pH 4.5 and 7.0 in 50 mM PBS containing 100 mM  $\text{K}^+$ .
